# Supplementary material for: Dissecting a complex chemical stress: chemogenomic profiling of plant hydrolysates
Source: PubMed Central journal article supplement — Mol Syst Biol. 2013 Jun 18;9:674. doi: 10.1038/msb.2013.30 (PMC3964314; doi:10.1038/msb.2013.30), 2013-06-18
Supplement: msb201330-s9.pdf [file msb201330-s9.pdf]

**Table S8**

| Strain                    | APA #   | Class  | # of Kan <sup>R</sup> (Exp-1) | # of Kan <sup>R</sup> (Exp-2) |
|---------------------------|---------|--------|-------------------------------|-------------------------------|
| ZMO0100::TN5              | APA2097 | stable | 10                            | 10                            |
| ZMO0101::TN5              | APA2098 | stable | 10                            | 10                            |
| ZMO0200::TN5              | APA2099 | mixed  | 4                             | 0                             |
| ZMO0472::TN5              | APA2090 | stable | 10                            | 10                            |
| ZMO0759::TN5              | APA2129 | stable | 10                            | 10                            |
| ZMO0760::TN5              | APA2091 | stable | 10                            | 10                            |
| ZMO0763::TN5              | APA2100 | stable | 10                            | 10                            |
| ZMO0774::TN5              | APA2019 | stable | 10                            | 10                            |
| ZMO0846::TN5              | APA2092 | stable | 10                            | 10                            |
| ZMO0975::TN5              | APA2104 | mixed  | 4                             | 1                             |
| ZMO1136::TN5              | APA2093 | stable | 10                            | 10                            |
| ZMO1252::TN5              | APA2094 | stable | 10                            | 10                            |
| ZMO1389::TN5              | APA2095 | stable | 10                            | 10                            |
| ZMO1404::TN5              | APA2024 | mixed  | 1                             | 7                             |
| ZMO1429::TN5              | APA2020 | mixed  | 2                             | 1                             |
| ZMO1430::TN5              | APA2068 | mixed  | 1                             | 1                             |
| ZMO1431::TN5              | APA2051 | mixed  | 1                             | 0                             |
| ZMO1432::TN5              | APA2132 | mixed  | 1                             | 0                             |
| ZMO1490::TN5              | APA2102 | stable | 10                            | 10                            |
| ZMO1520::TN5              | APA2131 | mixed  | 1                             | 1                             |
| ZMO1541::TN5              | APA2103 | stable | 10                            | 10                            |
| ZMO1722::TN5              | APA2128 | stable | 10                            | 10                            |
| ZMO1723::TN5              | APA2130 | stable | 10                            | 10                            |
| ZMO1874::TN5              | APA2077 | mixed  | 1                             | 0                             |
| ZMO1875::TN5              | APA2016 | stable | 10                            | 10                            |
| Predicted Essential Genes |         |        |                               |                               |
| leuS::TN5                 | APA254  | mixed  | 2                             | 3                             |
| ftsZ::TN5                 | APA255  | mixed  | 2                             | 4                             |
| rpoB::TN5                 | APA256  | mixed  | 1                             | 0                             |
